# Supplementary material for: The purplish bifurcate mussel Mytilisepta virgata gene expression atlas reveals a remarkable tissue functional specialization
Source: PubMed Central journal article supplement (PMC5549309; doi:10.1186/s12864-017-4012-z), 2017-08-08

# DIGESTIVE GLAND vs FOOT

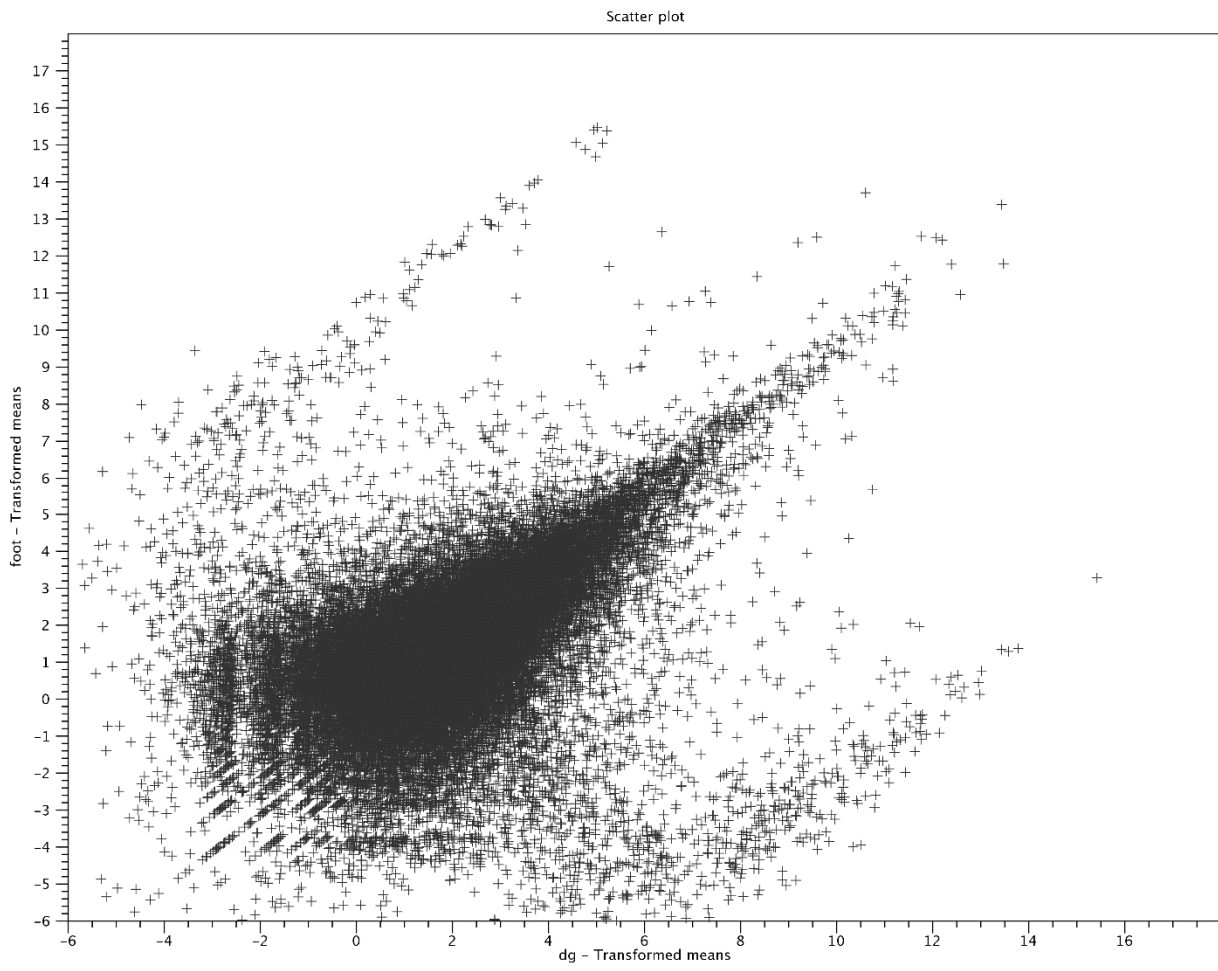

# DIGESTIVE GLAND VS GILLS

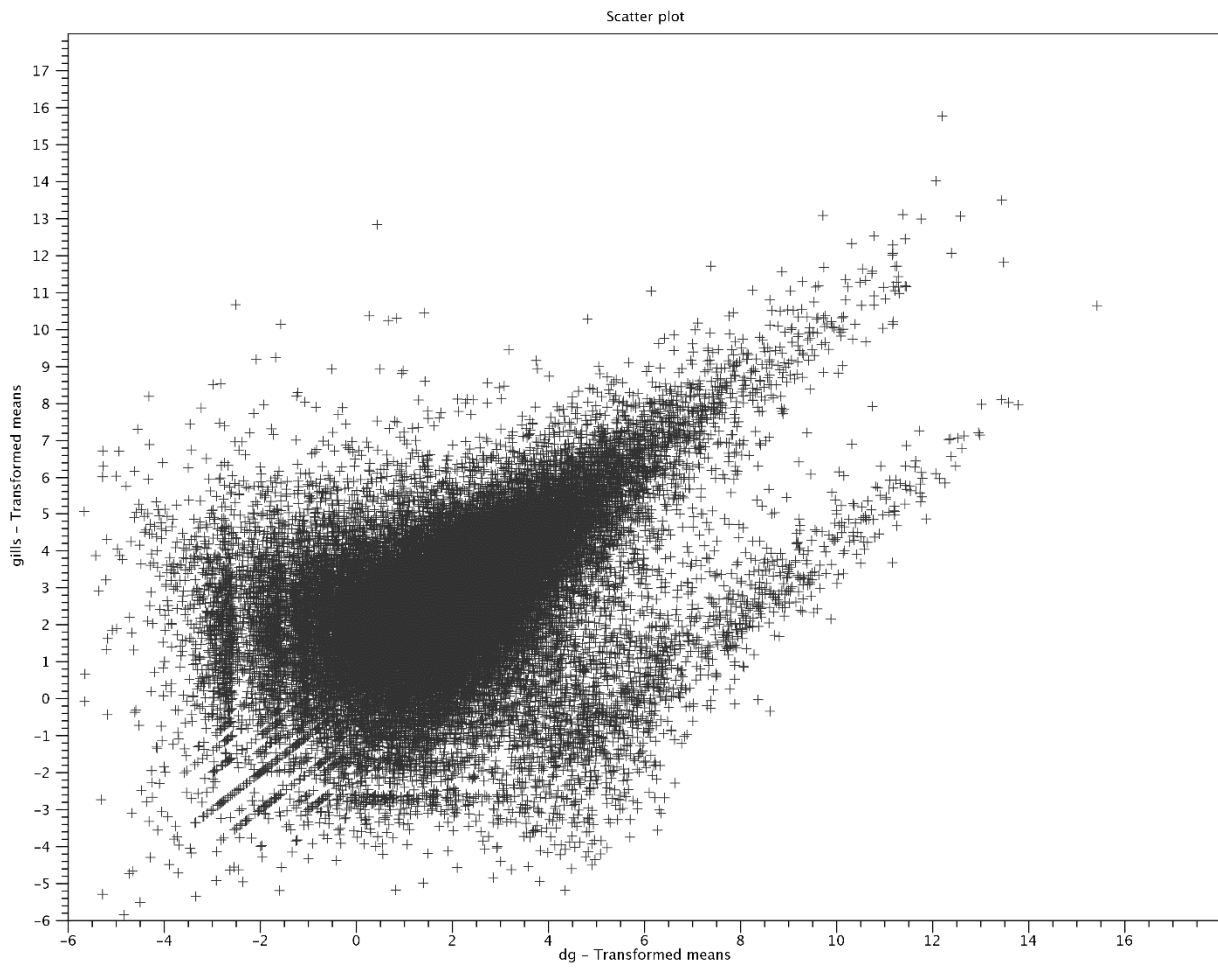

# DIGESTIVE GLAND vs MANTLE RIM

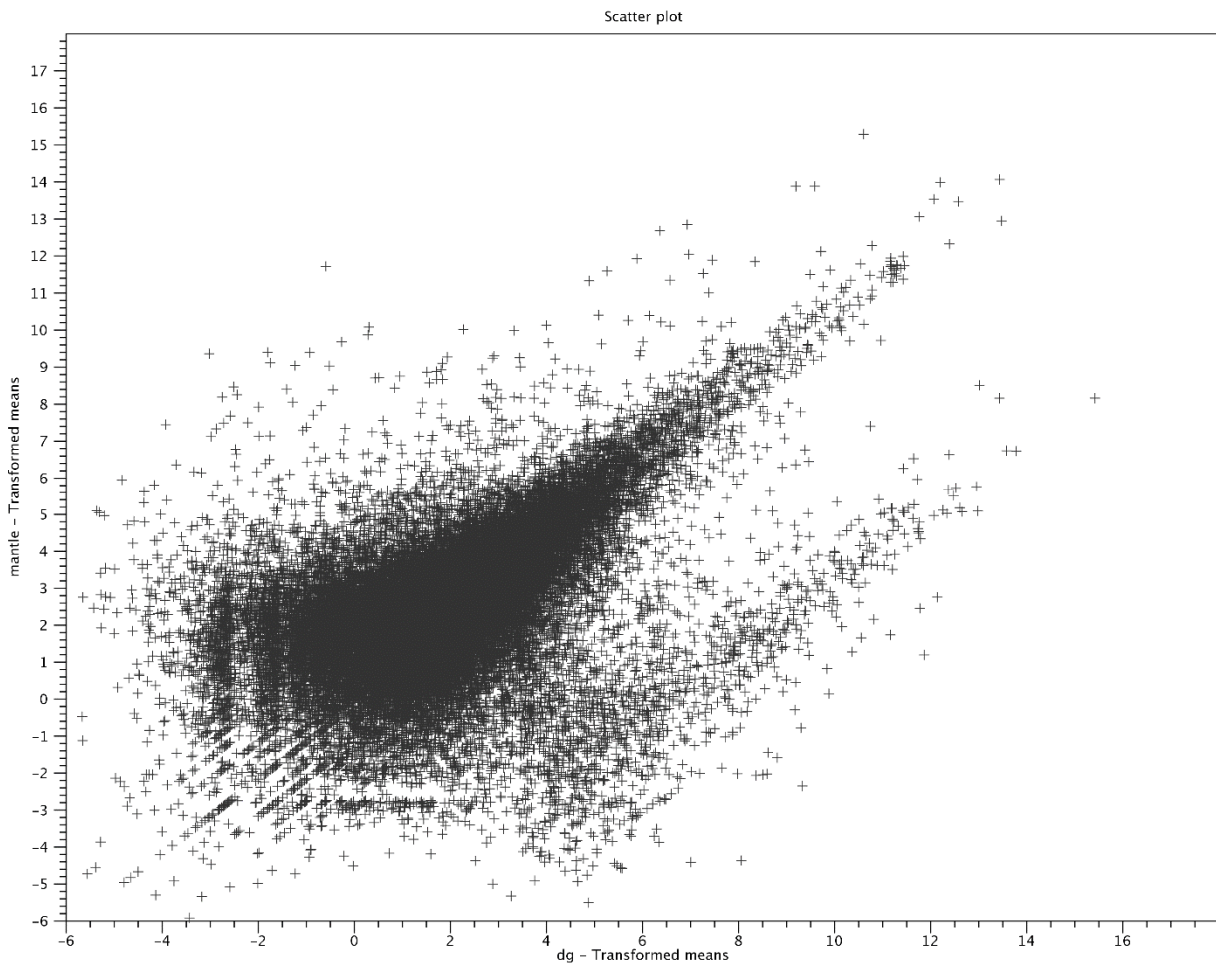

# DIGESTIVE GLAND VS POSTERIOR ADDUCTOR MUSCLE

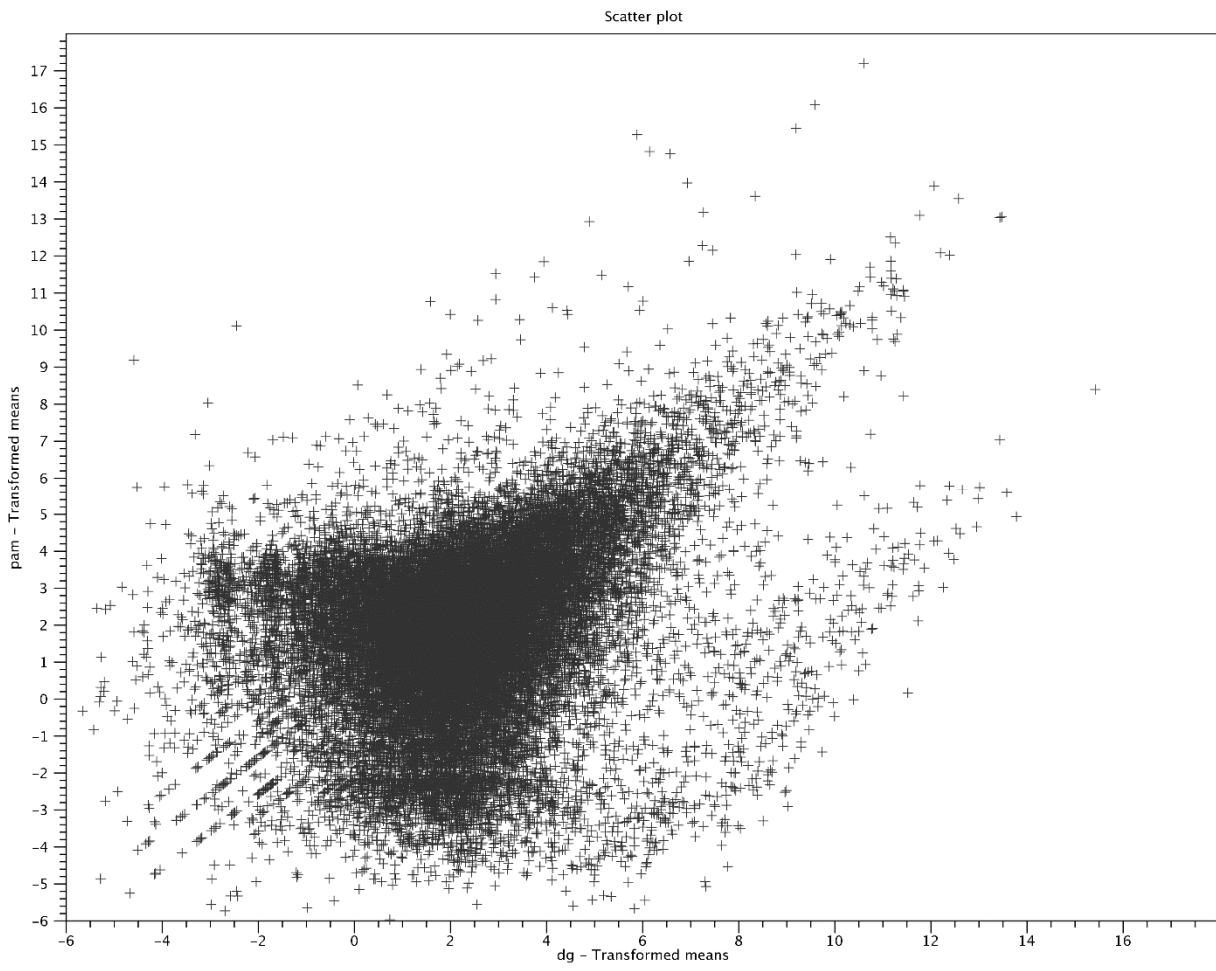

# GILLS VS FOOT

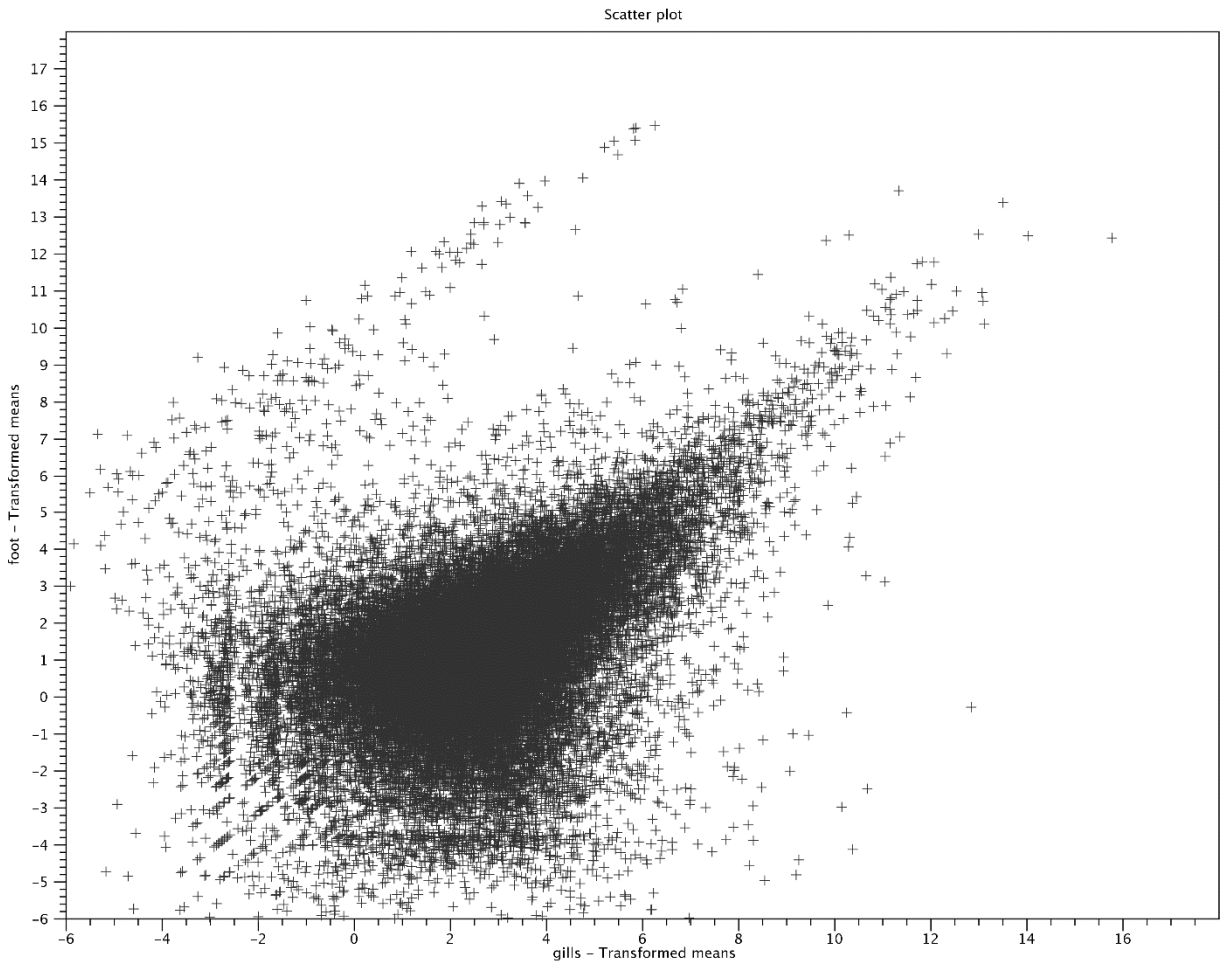

GILLS VS MANTLE RIM

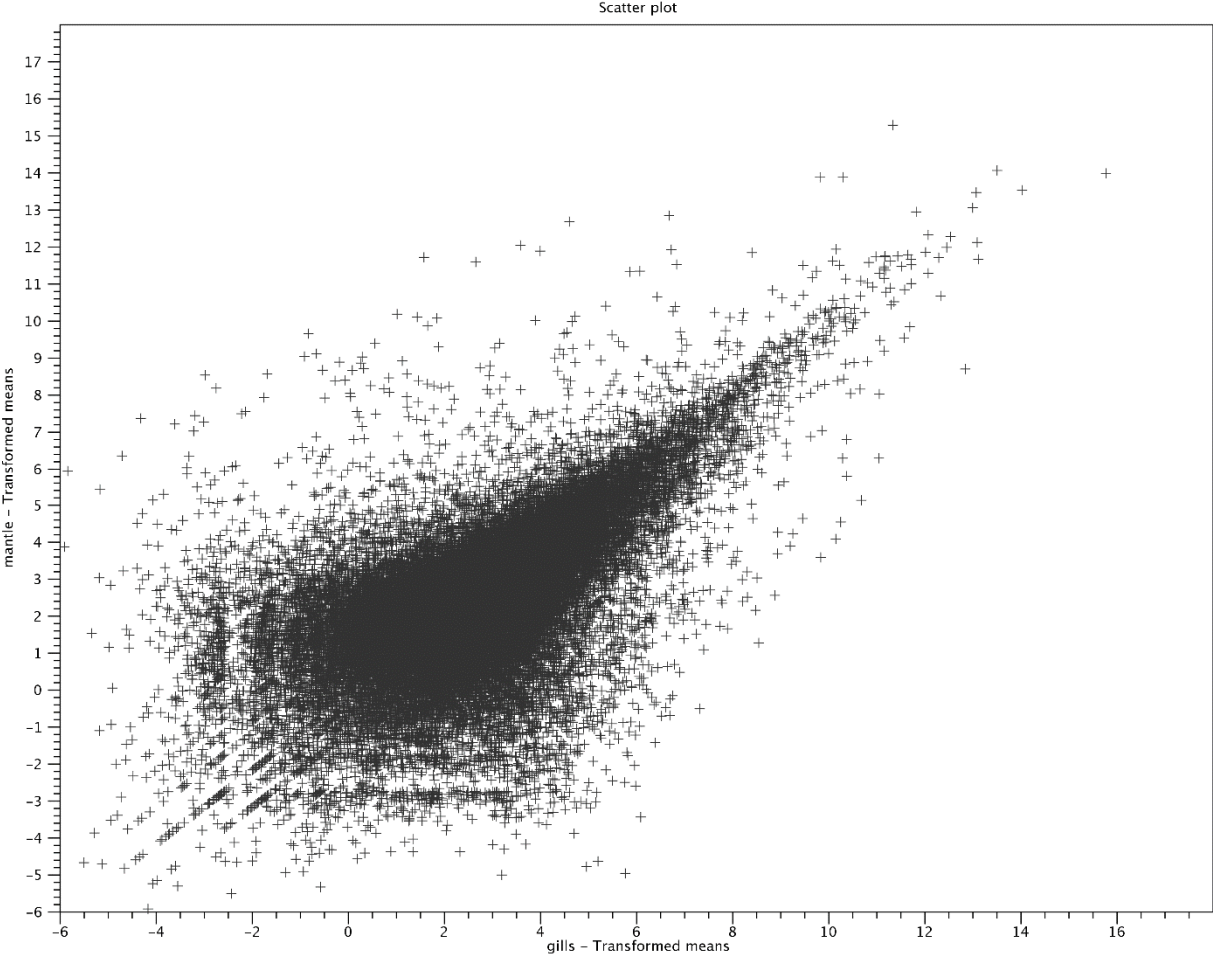

# MANTLE RIM vs FOOT

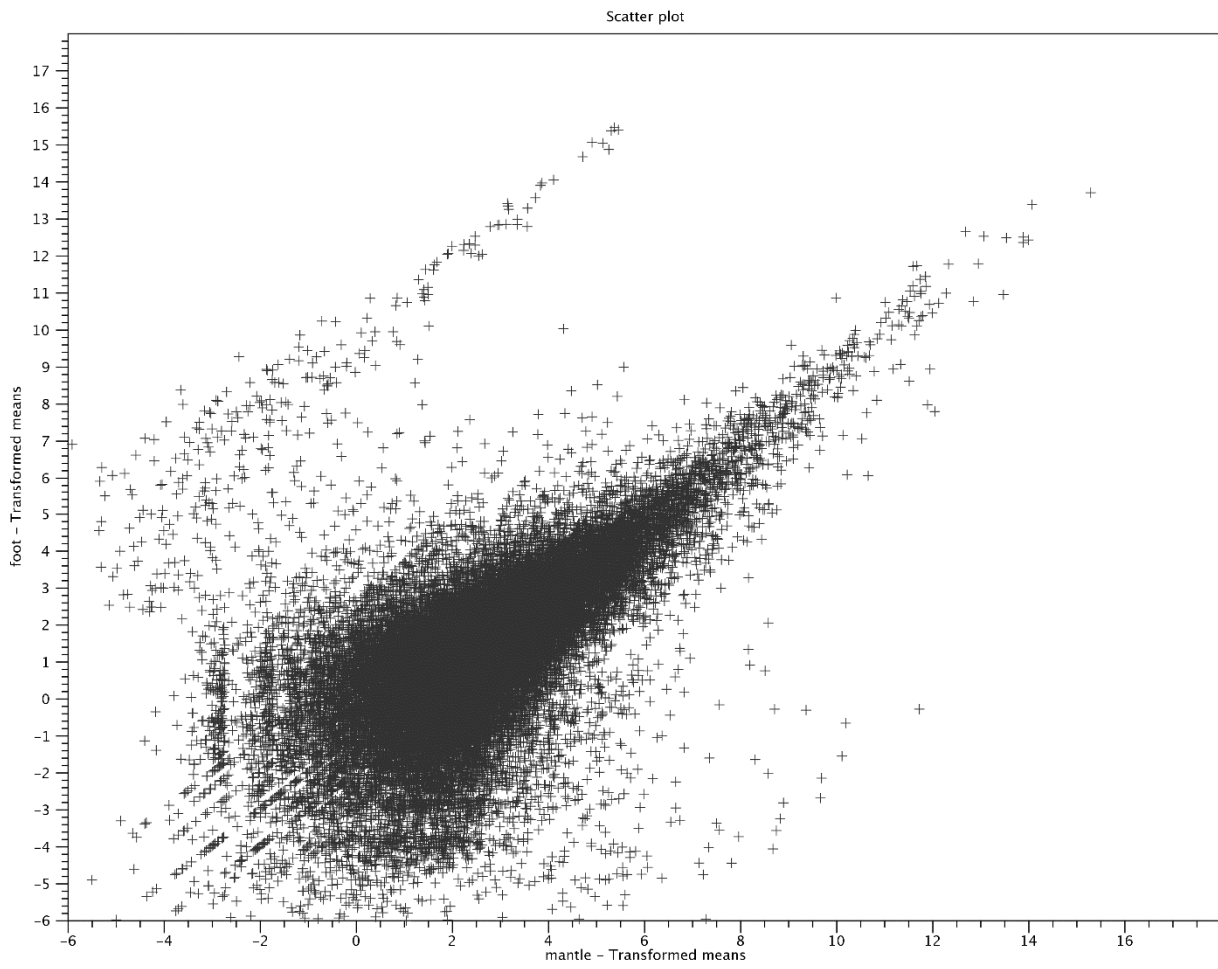

# POSTERIOR ADDUCTOR MUSCLE VS FOOT

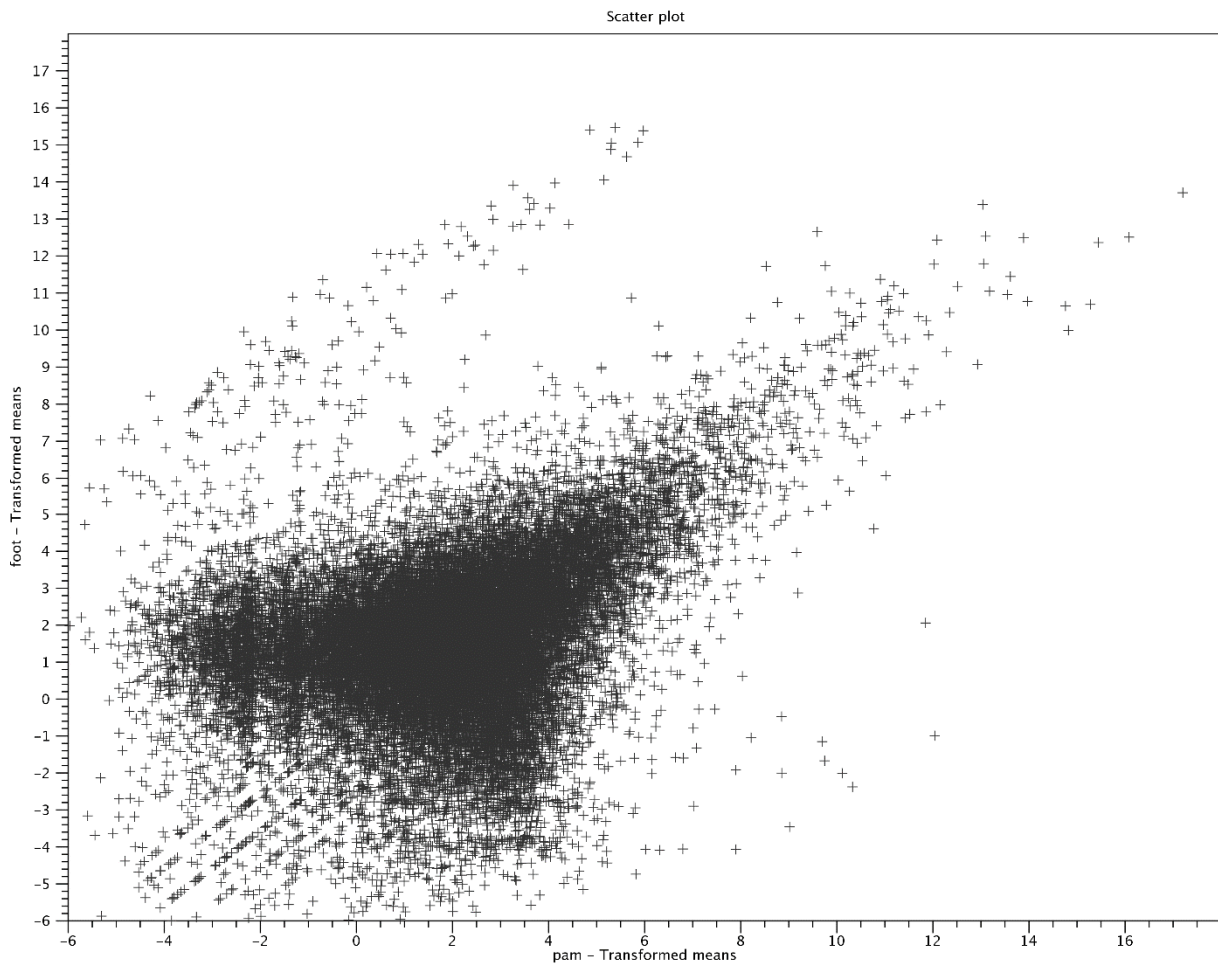



# POSTERIOR ADDUCTOR MUSCLE VS GILLS

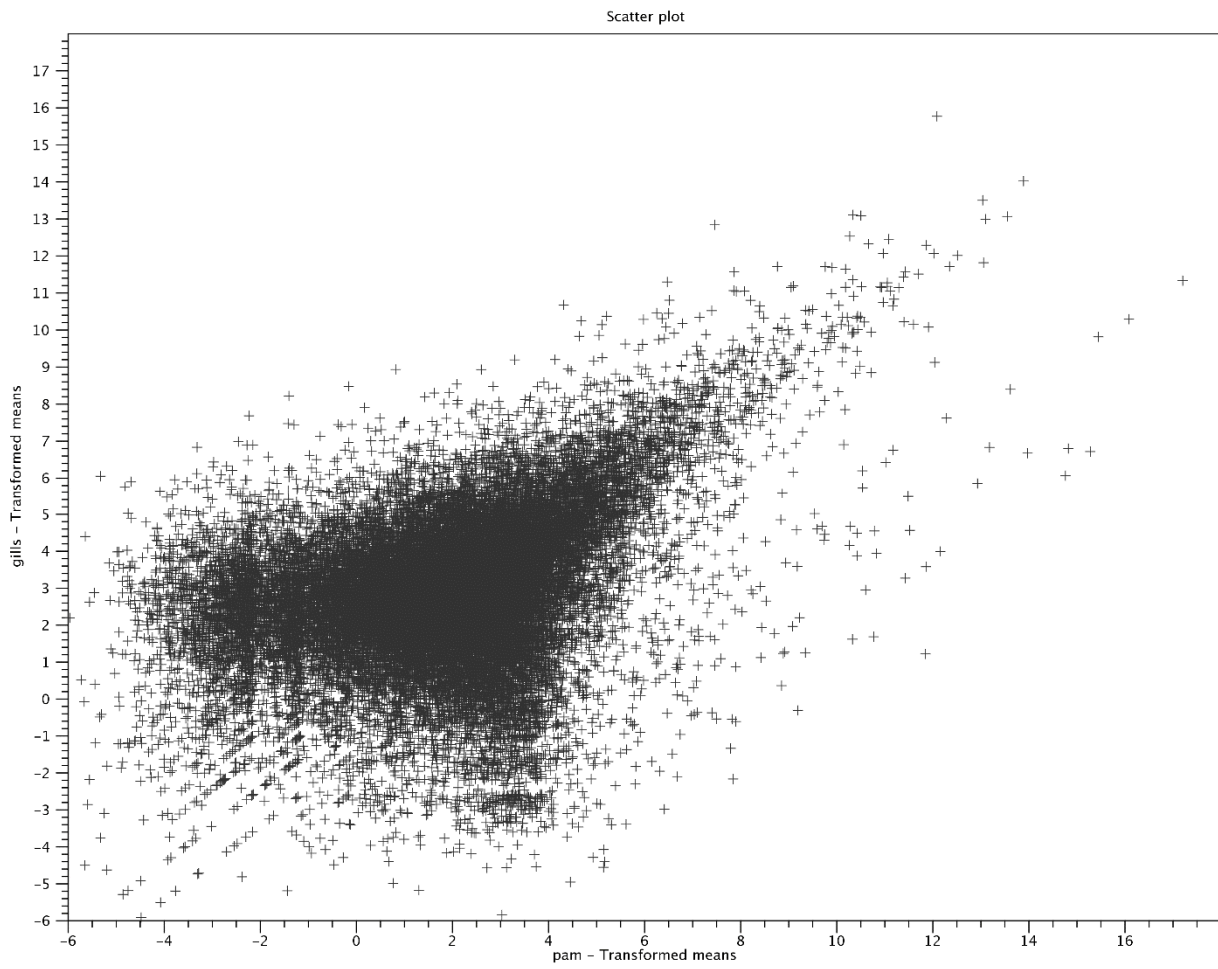

# POSTERIOR ADDUCTOR MUSCLE VS MANTLE RIM

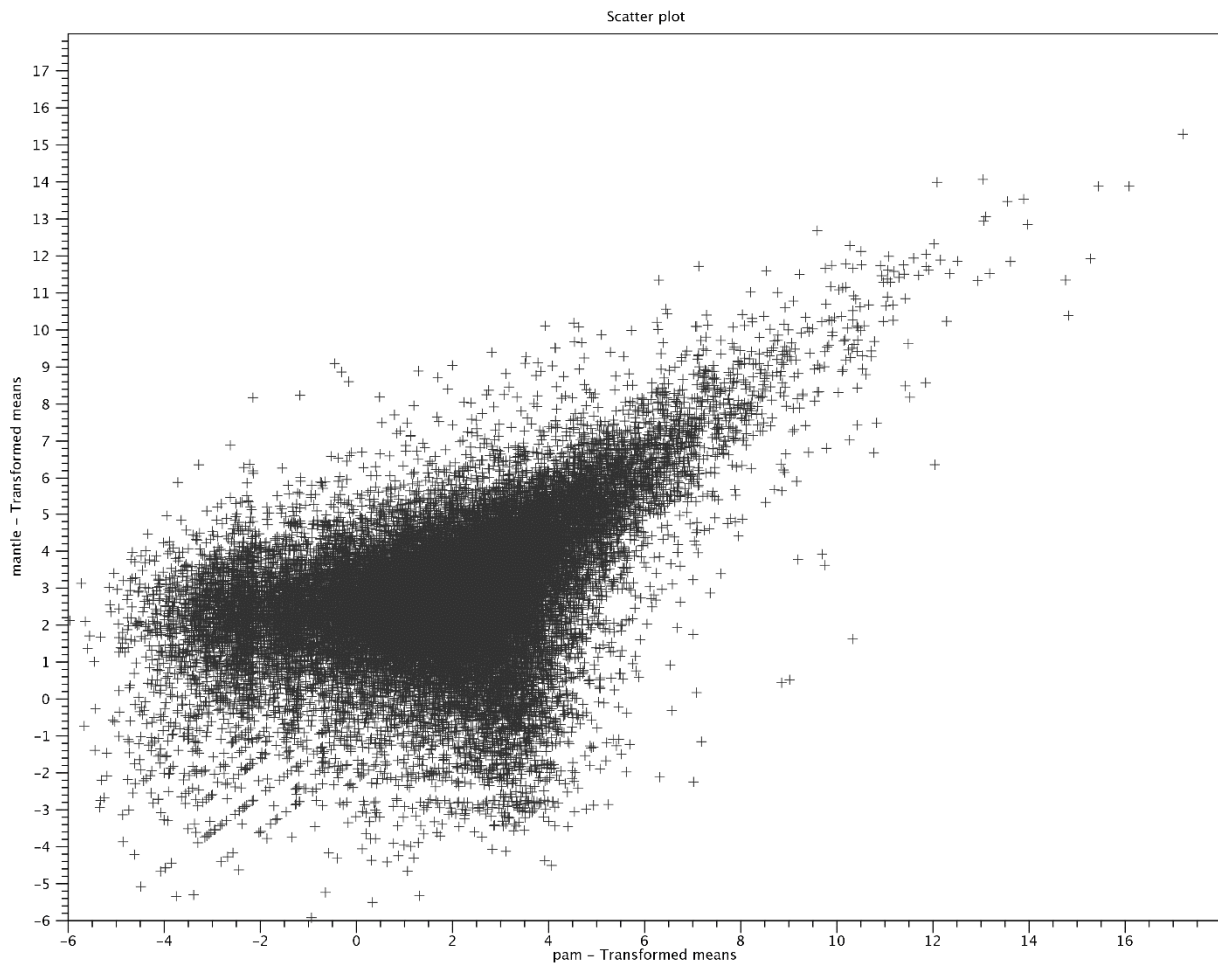

Supplement: 12864_2017_4012_MOESM3_ESM.pdf [file 12864_2017_4012_MOESM3_ESM.pdf]
